# Supplementary material
Source: PubMed Central journal article supplement (PMC3900238)
Supplement: NIHMS520822-supplement-Supporting_Information.pdf [file NIHMS520822-supplement-Supporting_Information.pdf]

## Supporting information

The *Aae*APO enzyme preparation was homogeneous by SDS/PAGE, and exhibited an  $A_{418\text{ nm}}/A_{280\text{ nm}}$  ratio of 1.7. The specific activity of the peroxygenase was  $59\text{ U mg}^{-1}$ , where 1 U represents the oxidation of  $1\text{ }\mu\text{mol}$  of 3,4-dimethoxybenzyl alcohol to 3,4-dimethoxybenzaldehyde in 1 min at RT. Chloroperoxidase was purchased from Bio-Research Products, Inc. with RZ of  $A_{400\text{ nm}}/A_{280\text{ nm}} > 1.3$ ,  $1,296\text{ U mg}^{-1}$ , where 1 unit represents the amount of CPO catalyzing the formation of  $1\text{ }\mu\text{mol}$  of dichlorodimedone from monochlorodimedone in 1 min at  $25\text{ }^\circ\text{C}$ , pH 2.75, 0.02 M KCl, 2 mM  $\text{H}_2\text{O}_2$ . All chemicals were of the best available purity from Aldrich. Sodium hypochlorite solution was standardized spectrophotometrically ( $\epsilon_{292\text{ nm}}=350\text{ M}^{-1}\text{cm}^{-1}$ ). Sodium hypobromite solution was freshly prepared by mixing sodium hypochlorite with sodium bromide under slightly basic conditions. A 5% excess of sodium bromide was used to ensure full conversion.<sup>[1]</sup> The final concentration of sodium hypobromite solution was determined spectrophotometrically ( $\epsilon_{329\text{ nm}}=332\text{ M}^{-1}\text{cm}^{-1}$ ). Buffers were freshly prepared daily using either citric acid/sodium citrate (pH 3-5) or  $\text{KH}_2\text{PO}_4/\text{K}_2\text{HPO}_4$  (pH 6 and 7). UV/Vis spectral measurements were performed on a Hewlett-Packard 8453 diode-array spectrophotometer at RT. Stopped-flow experiments were carried out on a Hi-Tech SF-61 DX2 double-mixing instrument with a 1 cm path length equipped with an ISOTEMP 3013 D thermostated bath.

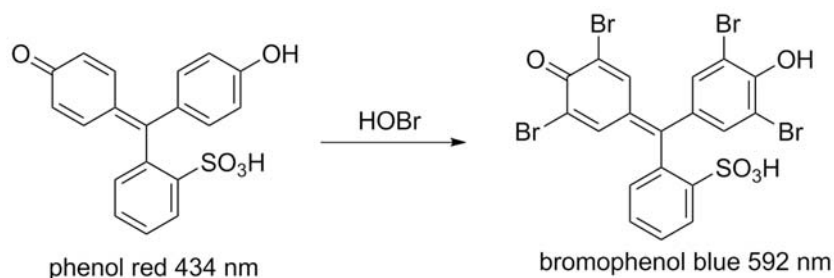

**Scheme S1.** Phenol red conversion to bromophenol blue upon the addition of HOBr.

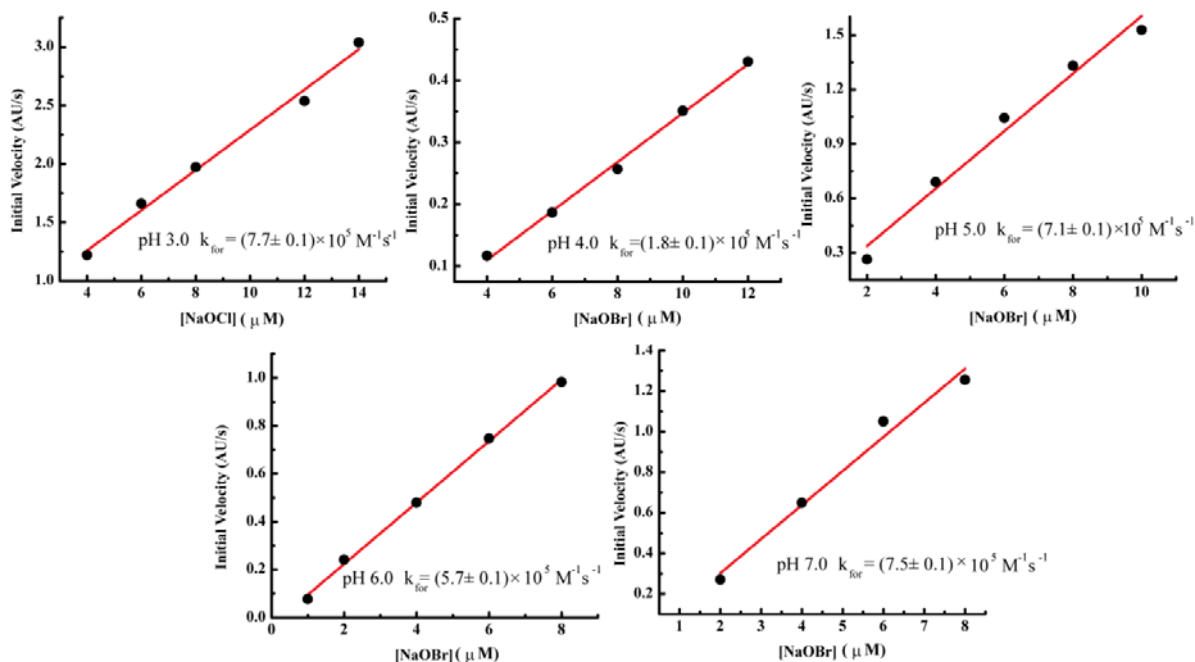

**Figure S1.** Initial velocity of ferric *Aae*APO oxidation as a function of [NaOX] for the reaction between  $2\text{ }\mu\text{M}$  *Aae*APO with NaOX, pH 3-7.

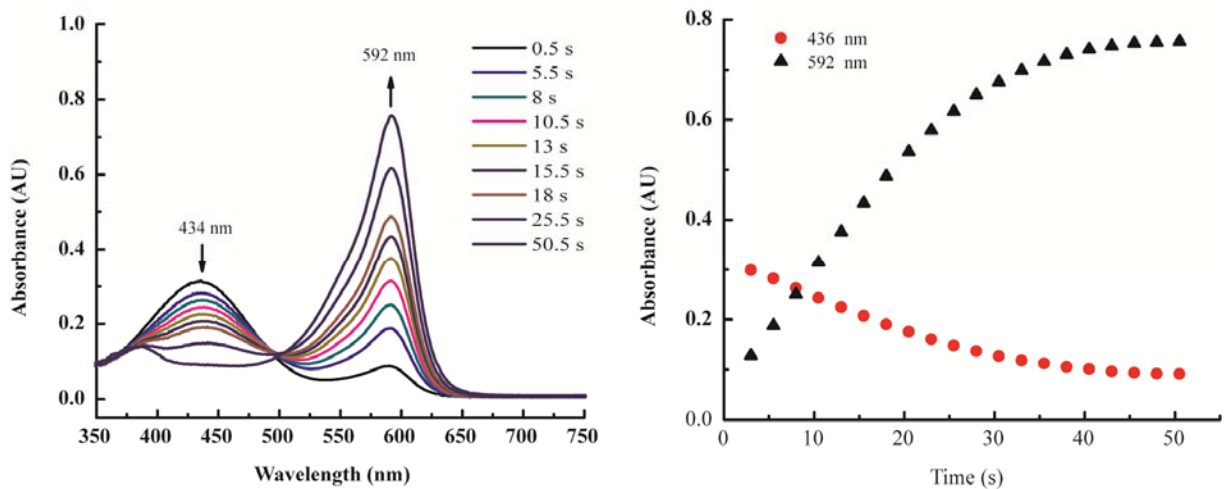

**Figure S2.** UV/Vis spectral changes observed for the bromination of phenol red ( $\lambda_{\max}=434$  nm) to form bromophenol blue ( $\lambda_{\max}=592$  nm) by 1 mM of  $\text{H}_2\text{O}_2$ , 10  $\mu\text{M}$  NaBr and 20 nM of *AaeAPO* at pH 5.0, RT.

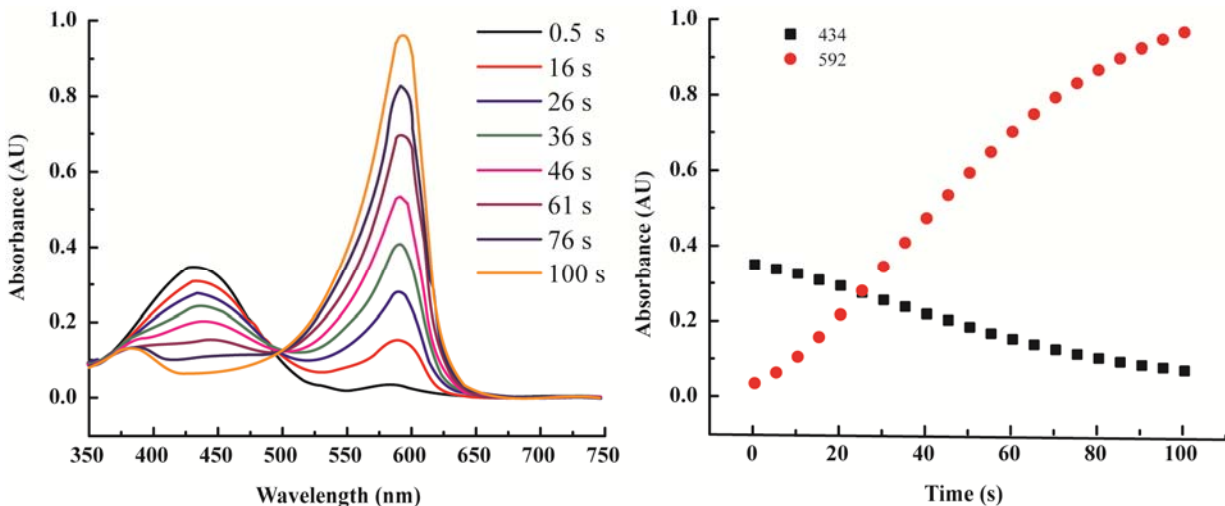

**Figure S3.** UV/Vis spectral changes observed for the bromination of phenol red ( $\lambda_{\max}=434$  nm) to bromophenol blue ( $\lambda_{\max}=592$  nm) by 1 mM of  $\text{H}_2\text{O}_2$ , 10 mM NaBr and 20 nM of CPO at pH 5.0, RT.

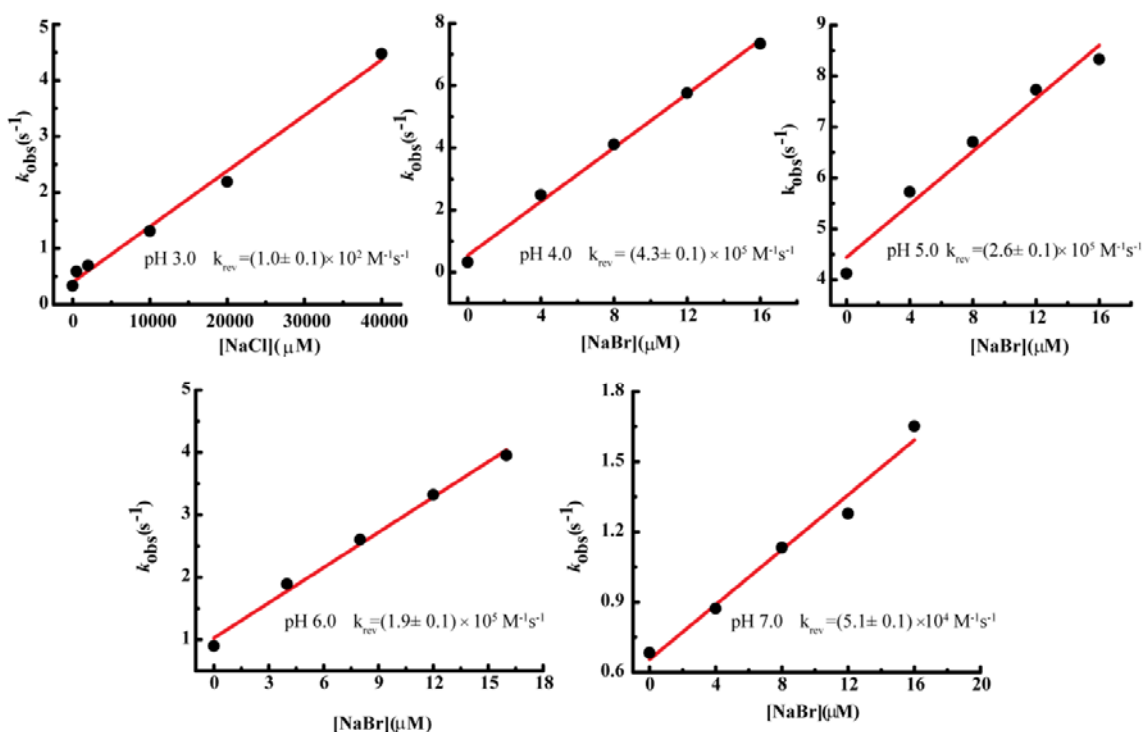

**Figure S4.** Pseudo-first order rate constants,  $k_{\text{obs}}$ , as a function of  $[\text{NaX}]$  for the reaction between *AaeAPO-I* with halide ions at different pHs.

**Table S1.** Kinetic and thermodynamic data,  $k_{\text{for}}$ ,  $k_{\text{rev}}$ ,  $K_{\text{equi}}$  and  $E'_{(\text{cpd-I}/\text{ferric})}$ , for oxygen atom transfer between halide ions and CPO-I.<sup>[a]</sup>

| pH  | $k_{\text{for}}$<br>( $\text{M}^{-1}\text{s}^{-1}$ ) | $k_{\text{rev}}$<br>( $\text{M}^{-1}\text{s}^{-1}$ ) | $K_{\text{equi}}$ | $E'_{(\text{cpd-I}/\text{ferric})}$ <sup>[b]</sup><br>[V, vs.NHE] |
|-----|------------------------------------------------------|------------------------------------------------------|-------------------|-------------------------------------------------------------------|
| 4.0 | $1.1 \times 10^6$                                    | $5.0 \times 10^5$                                    | 2.28              | 1.22                                                              |
| 5.0 | $2.3 \times 10^6$                                    | $6.7 \times 10^4$                                    | 34.8              | 1.16                                                              |
| 6.0 | $1.6 \times 10^6$                                    | $1.5 \times 10^3$                                    | 1067              | 1.10                                                              |
| 7.0 | $1.6 \times 10^6$                                    | $7.4 \times 10^2$                                    | 2176              | 1.06                                                              |

[a] Typical errors for the rate data are ~1% or less. [b] based on the HOBr/Br<sup>-</sup> couple at 4°C except as noted.<sup>[2]</sup>

[1] D. Lahaye, J. T. Groves, *J. Inorg. Biochem.* **2007**, *101*, 1786-1797.

[2] A. J. Bard, R. Parsons, J. Jordan, *Standard Potentials in Aqueous Solution*, Marcel Dekker, Inc., New York, **1985**, p. 67-92.
